# Supplementary material
Source: Springer Nature journal article supplement (https://www.springermedizin.de/resource/supplementary/12913_2011_2195_MOESM6_ESM.pdf/9529600)

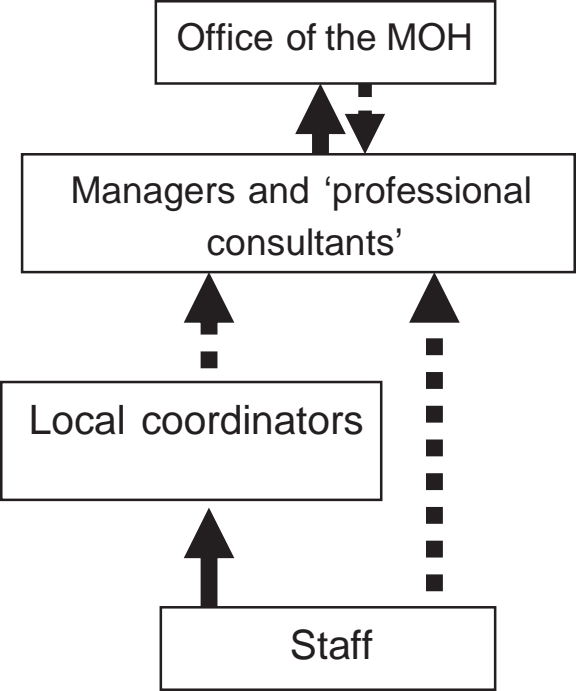

Supplement: MOESM6 [file 9529600]
